# Supplementary material for: A novel mouse model of Warburg Micro syndrome reveals roles for RAB18 in eye development and organisation of the neuronal cytoskeleton
Source: PubMed Central journal article supplement (PMC4036478; doi:10.1242/dmm.015222), 2014-04-24
Supplement: supp_7.6.711_DMM015222.pdf [file supp_7.6.711_DMM015222.pdf]

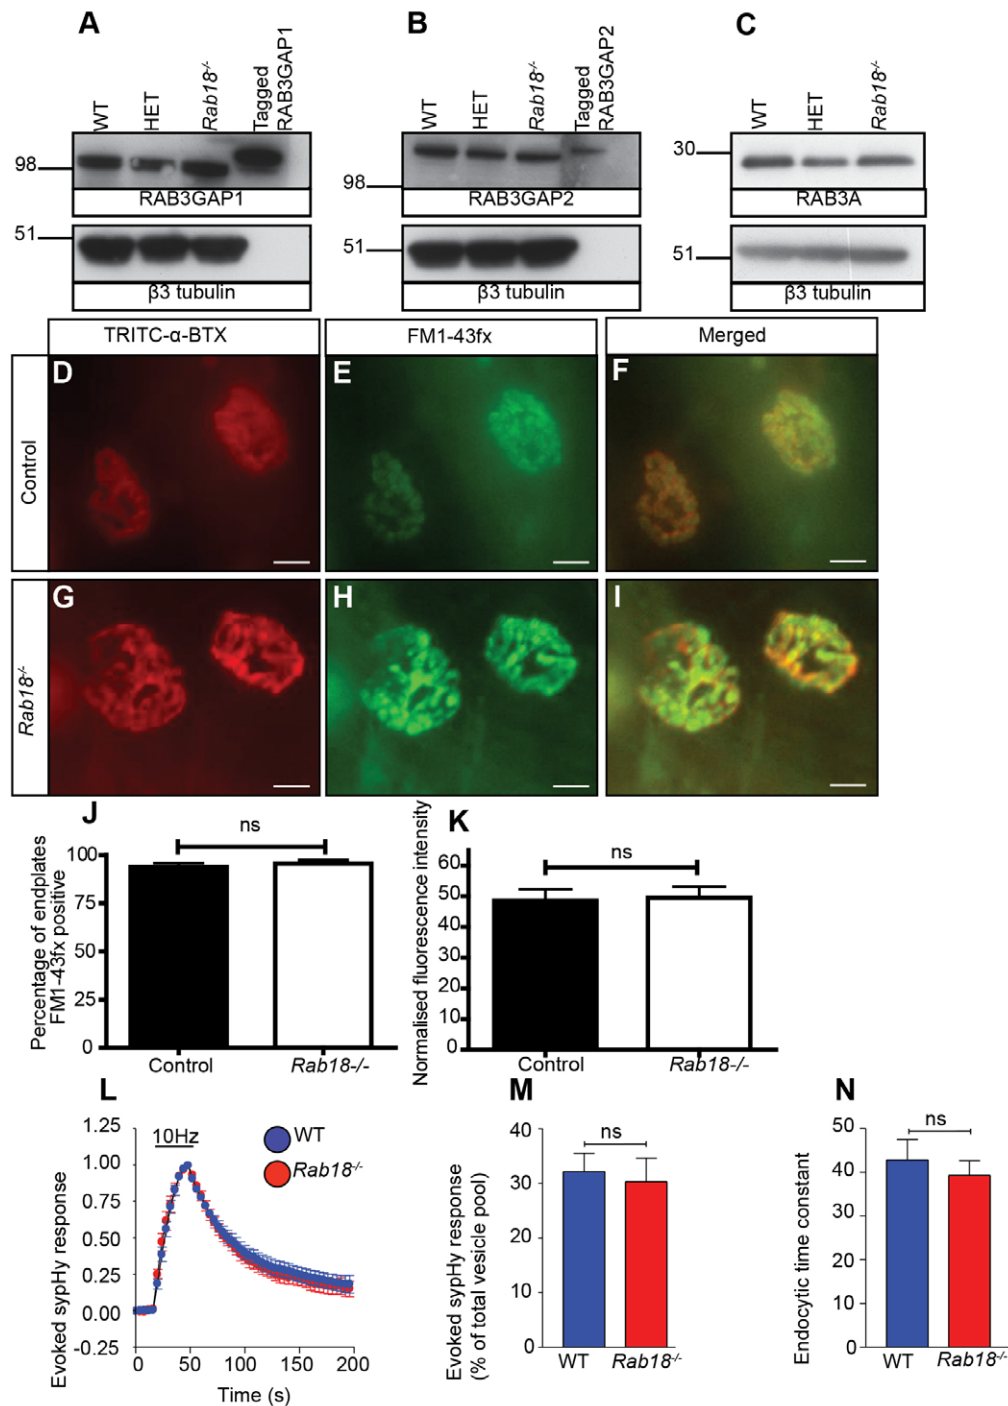

**Fig. S1. Loss of RAB18 has no effect on synaptic vesicle recycling in the CNS or PNS.** (A-C) Representative western blot analysis of crude synaptosomes from wild type, heterozygote and *Rab18*<sup>-/-</sup> mice and tagged RAB3GAP1 and RAB3GAP2 (HEK293 transfected MYC tagged RAB3GAP1 and RAB3GAP2 were used to confirm loading) show no alterations in RAB3GAP1 (A), RAB3GAP2 (B) or RAB3A (C) levels. (D-K) Analysis of synaptic vesicle recycling in lumbrical muscles from control (D-F) and mid/late symptomatic *Rab18*<sup>-/-</sup> (G-I) mice. Endplates were labelled with TRITC-conjugated  $\alpha$ -bungarotoxin (D,G) and co-stained with FM1-43fx (E,H) labelling recycling synaptic vesicles. (F and I) are merged images of (D,E) and (G,H) respectively. (I) Bar chart (mean  $\pm$  SEM) showing the majority of endplates examined effectively took up the FM1-43fx styryl dye irrespective of genotype (*Mann-Whitney test, two tailed, p value=0.3786, n=12 muscles*). (J) Bar chart (mean  $\pm$  SEM) showing no difference in FM1-43fx fluorescence intensity normalised to TRITC-conjugated  $\alpha$ -bungarotoxin in control and *Rab18*<sup>-/-</sup> littermates (*unpaired two tailed t-test, p value=0.8624, n=10 muscles control and 11 muscles Rab18*<sup>-/-</sup>). (L-N) Analysis of synaptic vesicle recycling in cortical neuron cultures from wild type (WT) and *Rab18*<sup>-/-</sup> (KO) E17.5 embryos. (L) Cortical neuronal cultures were transfected with sypHy and stimulated with a train of 300 action potentials (10 Hz, indicated by bar). Traces illustrate the average fluorescence response over time (wild-type (WT, blue circles, *n*=9) and *Rab18*<sup>-/-</sup> (KO, red circles, *n*=7)  $\pm$  SEM). (M,N) Bar graphs illustrate the lack of effect of RAB18 deletion on either (M) the average sypHy peak response (*t-test P*=0.74) or (N) the average speed of endocytosis (*t-test P*=0.55). *ns*=not significant, scale bar represents 5 $\mu$ m.

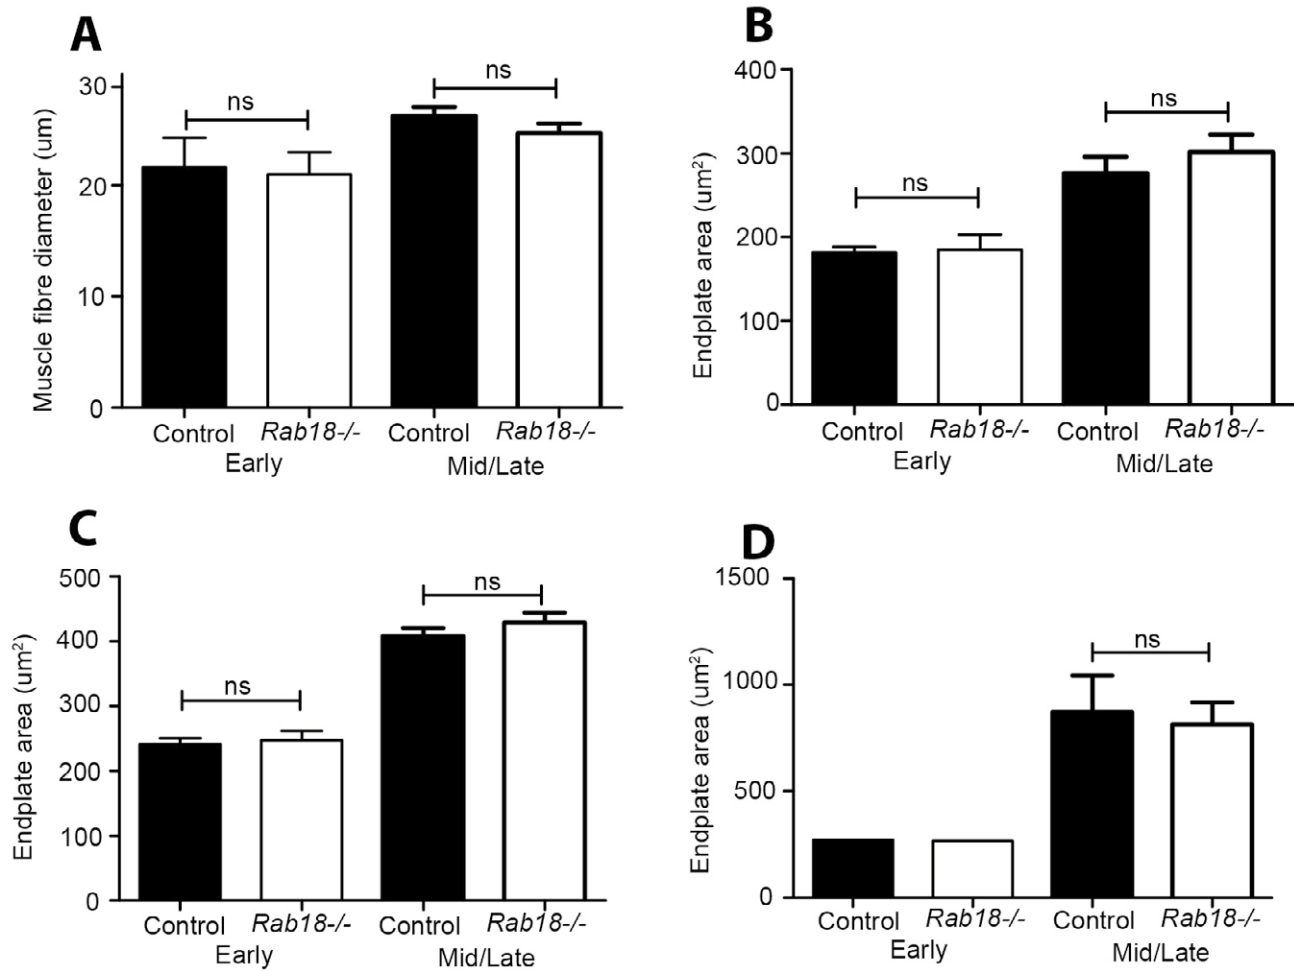

**Fig. S2. *Rab18*<sup>-/-</sup> mice show no muscular abnormalities.** (A) Bar chart of muscle fibre diameter measurements from whole mount lumbrical muscle preparations. (B-D) Whole mount flexor digitorum brevis (FDB) (B), lumbrical (C) and transverse abdominus (TVA) (D) muscles were stained with TRITC-conjugated  $\alpha$ -bungarotoxin and endplate area quantified. No atrophy or swelling of endplates or muscle fibres was observed in early or mid/late symptomatic *Rab18*<sup>-/-</sup> mice. Mean  $\pm$  SEM, Unpaired two-tailed *t*-test. Early symptomatic: FDB *p* value=0.8661, *n*=7 muscles, lumbrical *p* value=0.6966, *n*=10 muscles, TVA *n*=1 muscle. Mid/late symptomatic: FDB *p* value=0.4038, *n*=9 muscles control and *n*=8 muscles *Rab18*<sup>-/-</sup>, lumbrical *p* value=0.2887, *n*=10 muscles, TVA *p* value=0.7290, *n*=3 muscles.

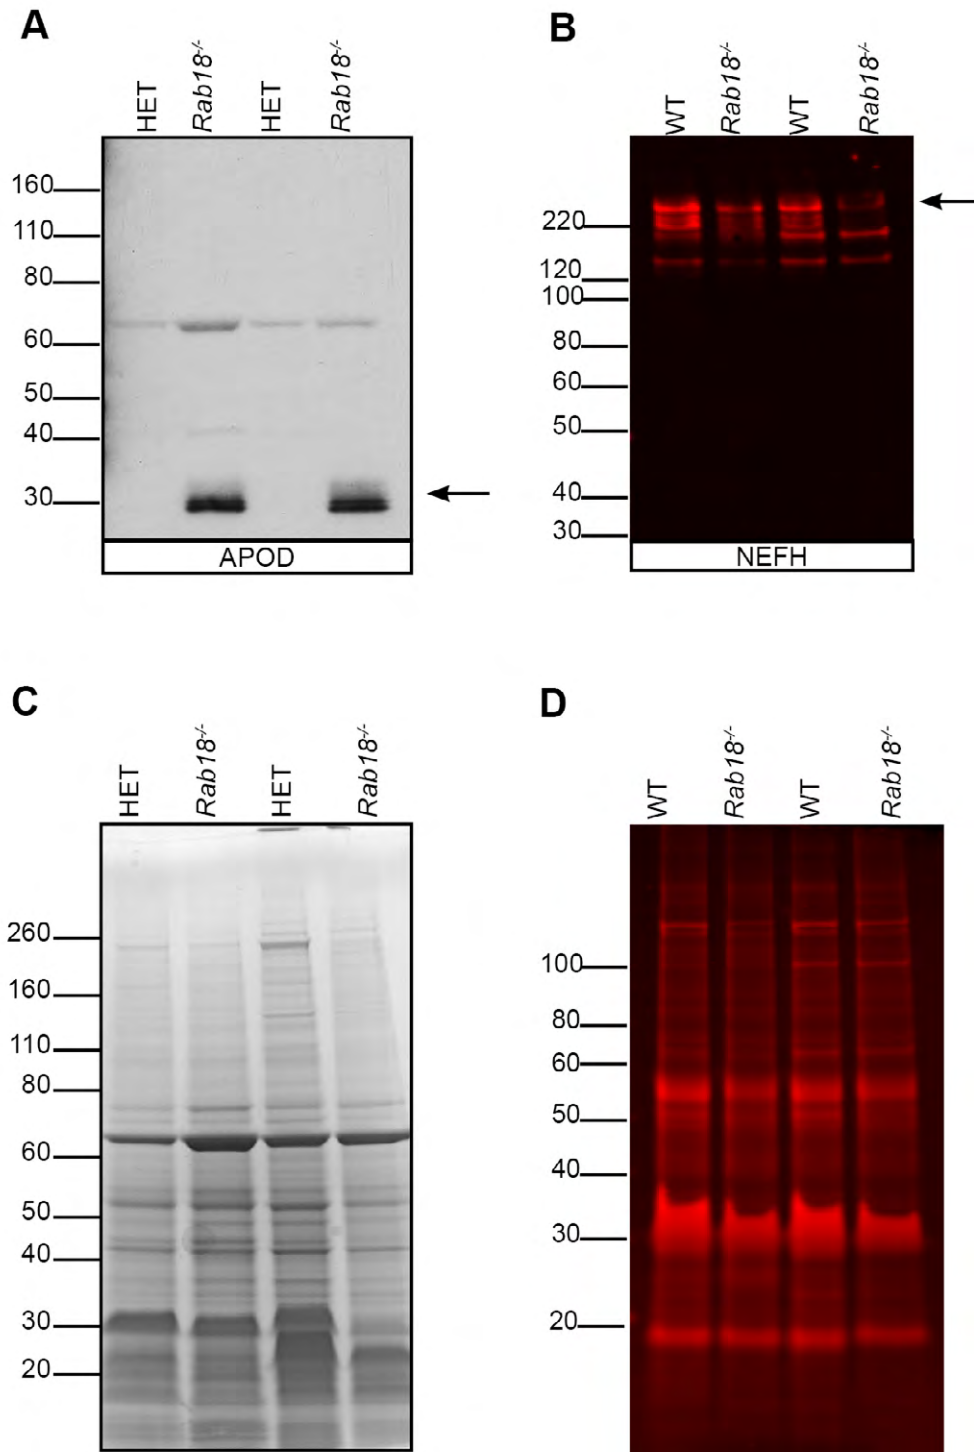

**Fig. S3. Proteomic validation in *Rab18*<sup>-/-</sup> sciatic nerves.** (A) Representative Western blot analysis of proteomic validation on heterozygote (HET) and *Rab18*<sup>-/-</sup> sciatic nerve, showing upregulation of Apolipoprotein D (ApoD) in *Rab18*<sup>-/-</sup> nerves. (B) Instant Blue stained gel of protein loading using samples run in (A). (C) Representative Western blot analysis of proteomic validation on wild type (WT) and *Rab18*<sup>-/-</sup> sciatic nerve, showing downregulation of neurofilament heavy chain (NEFH) in *Rab18*<sup>-/-</sup> nerves. (D) Instant Blue stained gel of protein loading using samples run in (C).

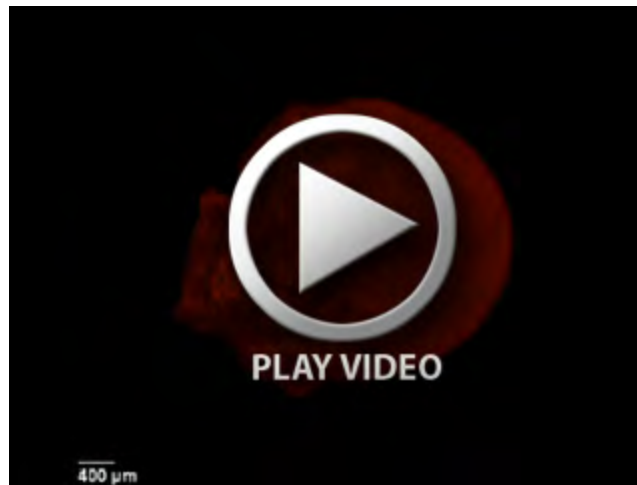

**Movie S1. Optical projection tomography on adult wild-type unpigmented eyes.** Optical projection tomography on adult wild-type unpigmented eyes showing normal lens.

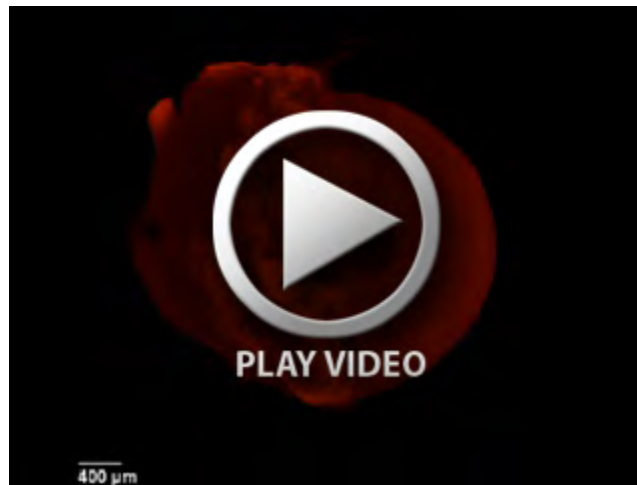

**Movie S2. Optical projection tomography on adult *Rab18*<sup>-/-</sup> unpigmented eyes.** Optical projection tomography on adult *Rab18*<sup>-/-</sup> unpigmented eyes showing dense nuclear cataracts in the centre of the lens.

**Table S1. Heterozygote and *Rab18*<sup>-/-</sup> mice are found at non-Mendelian ratios at weaning but not at various stages of embryogenesis. Ns=not significant**

**Table S2. iTRAQ identification of proteins >20% upregulated in *Rab18*<sup>-/-</sup> compared to heterozygotes with 2 or more unique peptides**

**Table S3. iTRAQ identification of proteins >20% downregulated in *Rab18*<sup>-/-</sup> compared to heterozygotes with 2 or more unique peptides**

**Table S1: Heterozygote and *Rab18*<sup>-/-</sup> mice are found at non-Mendelian ratios at weaning but not at various stages of embryogenesis.**

Ns= not significant

| <b>Genotype</b>              | <b>WT</b> | <b>HET</b> | <b><i>Rab18</i><sup>-/-</sup></b> | <b># litters</b> | <b>Chi-squared</b> |
|------------------------------|-----------|------------|-----------------------------------|------------------|--------------------|
| HET x HET litters at weaning | 336       | 388        | 164                               | 118              | p<0.0001           |
| Female BL6 x male HET        | 188       | 104        |                                   | 44               | p<0.0001           |
| Male BL6 x female HET        | 38        | 34         |                                   | 11               | Ns                 |
| HET x HET embryos            | 72        | 133        | 60                                | 35               | Ns                 |

**Table S2: iTRAQ identification of proteins >20% upregulated in *Rab18*<sup>-/-</sup> compared to heterozygotes with 2 or more unique peptides**

| Symbol    | Protein name                                      | Accession number | # Unique peptides | Ratio Rab18/het |
|-----------|---------------------------------------------------|------------------|-------------------|-----------------|
| MYH4      | myosin, heavy chain 4, skeletal muscle            | IPI00404837.3    | 32                | 4.278           |
| KRT1      | keratin 1                                         | IPI00625729.2    | 2                 | 3.145           |
| KRT5      | keratin 5                                         | IPI00470126.4    | 4                 | 2.842           |
| KRT10     | keratin 10                                        | IPI01008564.1    | 4                 | 2.696           |
| COL1A2    | collagen, type I, alpha 2                         | IPI00988109.1    | 12                | 2.556           |
| APOD      | apolipoprotein D                                  | IPI00314309.3    | 5                 | 2.366           |
| KRT13     | keratin 13                                        | IPI00136056.1    | 2                 | 2.355           |
| COL1A1    | collagen, type I, alpha 1                         | IPI00329872.1    | 9                 | 2.180           |
| KRT14     | keratin 14                                        | IPI00227140.1    | 5                 | 1.928           |
| KRT2      | keratin 2                                         | IPI00622240.4    | 3                 | 1.886           |
| LGALS3    | lectin, galactoside-binding, soluble, 3           | IPI00989544.2    | 2                 | 1.871           |
| Ighg      | Immunoglobulin heavy chain (gamma polypeptide)    | IPI00109910.4    | 8                 | 1.851           |
| Ighg2a    | immunoglobulin heavy constant gamma 2A            | IPI00954663.1    | 2                 | 1.846           |
| ACTC1     | actin, alpha, cardiac muscle 1                    | IPI00114593.1    | 8                 | 1.731           |
| COL28A1   | collagen, type XXVIII, alpha 1                    | IPI00357842.7    | 8                 | 1.663           |
| HIST1H1C  | histone cluster 1, H1c                            | IPI00223713.5    | 4                 | 1.657           |
| IGHM      | immunoglobulin heavy constant mu                  | IPI00468055.3    | 4                 | 1.653           |
| RPL6      | ribosomal protein L6                              | IPI00313222.5    | 11                | 1.645           |
| JUP       | junction plakoglobin                              | IPI00229475.1    | 2                 | 1.626           |
| HNRNPA2B1 | heterogeneous nuclear ribonucleoprotein A2/B1     | IPI00405058.6    | 4                 | 1.549           |
| IGKC      | immunoglobulin kappa constant                     | IPI00850020.1    | 2                 | 1.545           |
| Pzp       | pregnancy zone protein                            | IPI00624663.3    | 12                | 1.543           |
| PCOLCE    | procollagen C-endopeptidase enhancer              | IPI00120176.1    | 2                 | 1.533           |
| HNRNPC    | heterogeneous nuclear ribonucleoprotein C (C1/C2) | IPI00759870.1    | 2                 | 1.508           |
| FGA       | fibrinogen alpha chain                            | IPI00115522.3    | 8                 | 1.493           |
| RPL18A    | ribosomal protein L18a                            | IPI00162790.1    | 3                 | 1.484           |

|           |                                                             |               |    |       |
|-----------|-------------------------------------------------------------|---------------|----|-------|
| COL6A3    | collagen, type VI, alpha 3                                  | IPI00988390.1 | 2  | 1.482 |
| COL4A1    | collagen, type IV, alpha 1                                  | IPI00109588.4 | 5  | 1.466 |
| FGG       | fibrinogen gamma chain                                      | IPI00990997.1 | 12 | 1.464 |
| RPL15     | ribosomal protein L15                                       | IPI00273803.4 | 2  | 1.459 |
| FGB       | fibrinogen beta chain                                       | IPI00279079.1 | 8  | 1.457 |
| RPL13A    | ribosomal protein L13a                                      | IPI00223217.6 | 3  | 1.414 |
| RPL24     | ribosomal protein L24                                       | IPI00880689.1 | 3  | 1.409 |
| RPL14     | ribosomal protein L14                                       | IPI00133185.3 | 3  | 1.408 |
| BCAP31    | B-cell receptor-associated protein 31                       | IPI00230422.6 | 2  | 1.408 |
| COL4A2    | collagen, type IV, alpha 2                                  | IPI00338452.3 | 10 | 1.401 |
| THY1      | Thy-1 cell surface antigen                                  | IPI00109727.1 | 4  | 1.399 |
| STEAP3    | STEAP family member 3, metalloredutase                      | IPI00830824.1 | 3  | 1.371 |
| RPS11     | ribosomal protein S11                                       | IPI00762542.2 | 5  | 1.362 |
| CAV1      | caveolin 1, caveolae protein, 22kDa                         | IPI00117829.1 | 3  | 1.348 |
| TM9SF2    | transmembrane 9 superfamily member 2                        | IPI00988824.1 | 2  | 1.343 |
| Rpl10     | ribosomal protein L10                                       | IPI00775915.1 | 5  | 1.337 |
| LMNA      | lamin A/C                                                   | IPI00400300.1 | 32 | 1.334 |
| NDUFB6    | NADH dehydrogenase (ubiquinone) 1 beta subcomplex, 6, 17kDa | IPI00648743.1 | 2  | 1.327 |
| Rrbp1     | ribosome binding protein 1                                  | IPI00755120.2 | 3  | 1.324 |
| LOC638399 | 60S ribosomal protein L31-like                              | IPI00677102.1 | 2  | 1.323 |
| COPA      | coatomer protein complex, subunit alpha                     | IPI00989407.1 | 4  | 1.322 |
| PABPC1    | poly(A) binding protein, cytoplasmic 1                      | IPI00124287.2 | 2  | 1.322 |
| RPL7      | ribosomal protein L7                                        | IPI00311236.1 | 10 | 1.321 |
| MTCH1     | mitochondrial carrier 1                                     | IPI00742287.1 | 2  | 1.316 |
| Gm5453    | predicted gene 5453                                         | IPI00461641.2 | 3  | 1.306 |
| RPL18     | ribosomal protein L18                                       | IPI00555113.2 | 5  | 1.304 |
| HIST1H1B  | histone cluster 1, H1b                                      | IPI00230133.5 | 6  | 1.304 |
| SEC23A    | Sec23 homolog A ( <i>S. cerevisiae</i> )                    | IPI00985577.1 | 3  | 1.293 |
| ENTPD2    | ectonucleoside triphosphate diphosphohydrolase 2            | IPI00115089.2 | 9  | 1.293 |
| POSTN     | periostin, osteoblast specific factor                       | IPI00409326.1 | 10 | 1.290 |
| GNG12     | guanine nucleotide binding protein (G protein), gamma 12    | IPI00227838.4 | 3  | 1.290 |
| HNRNPL    | heterogeneous nuclear ribonucleoprotein L                   | IPI00985815.1 | 4  | 1.289 |

|         |                                                                           |                |    |       |
|---------|---------------------------------------------------------------------------|----------------|----|-------|
| RPS4X   | ribosomal protein S4, X-linked                                            | IPI00990327.1  | 10 | 1.281 |
| PICALM  | phosphatidylinositol binding clathrin assembly protein                    | IPI00404434.1  | 2  | 1.279 |
| GNB2L1  | guanine nucleotide binding protein (G protein), beta polypeptide 2-like 1 | IPI00317740.5  | 2  | 1.279 |
| APOA1   | apolipoprotein A-I                                                        | IPI00877236.1  | 13 | 1.276 |
| NDUFA9  | NADH dehydrogenase (ubiquinone) 1 alpha subcomplex, 9, 39kDa              | IPI00120212.2  | 3  | 1.272 |
| NSDHL   | NAD(P) dependent steroid dehydrogenase-like                               | IPI00128692.1  | 5  | 1.271 |
| CFH     | complement factor H                                                       | IPI00856390.1  | 3  | 1.270 |
| RPS2    | ribosomal protein S2                                                      | IPI00318492.11 | 10 | 1.267 |
| RPS3    | ribosomal protein S3                                                      | IPI00134599.1  | 8  | 1.264 |
| KARS    | lysyl-tRNA synthetase                                                     | IPI00620145.1  | 2  | 1.263 |
| Gm7429  | predicted pseudogene 7429                                                 | IPI00463886.1  | 6  | 1.257 |
| DAD1    | defender against cell death 1                                             | IPI00109082.3  | 2  | 1.256 |
| MCAM    | melanoma cell adhesion molecule                                           | IPI00667748.1  | 4  | 1.252 |
| RPL10A  | ribosomal protein L10a                                                    | IPI00849927.1  | 5  | 1.250 |
| DYNC111 | dynein, cytoplasmic 1, intermediate chain 1                               | IPI00990353.1  | 2  | 1.250 |
| ANXA1   | annexin A1                                                                | IPI00230395.5  | 9  | 1.249 |
| HNRNPU  | heterogeneous nuclear ribonucleoprotein U (scaffold attachment factor A)  | IPI00970121.1  | 10 | 1.247 |
| DDX5    | DEAD (Asp-Glu-Ala-Asp) box helicase 5                                     | IPI00420363.3  | 4  | 1.246 |
| MGLL    | monoglyceride lipase                                                      | IPI00953761.1  | 3  | 1.245 |
| C3      | complement component 3                                                    | IPI00323624.4  | 30 | 1.244 |
| SYNCRIP | synaptotagmin binding, cytoplasmic RNA interacting protein                | IPI01027389.1  | 2  | 1.243 |
| LAMB2   | laminin, beta 2 (laminin S)                                               | IPI00119065.2  | 47 | 1.242 |
| RPS15A  | ribosomal protein S15a                                                    | IPI00857457.1  | 2  | 1.239 |
| KDELR3  | KDEL (Lys-Asp-Glu-Leu) endoplasmic reticulum protein retention receptor 3 | IPI00320629.3  | 2  | 1.238 |
| RPN1    | ribophorin I                                                              | IPI00309035.2  | 11 | 1.238 |
| MT-CO2  | cytochrome c oxidase subunit II                                           | IPI00131176.1  | 3  | 1.237 |
| RPL8    | ribosomal protein L8                                                      | IPI00137787.3  | 6  | 1.236 |
| TNXB    | tenascin XB                                                               | IPI00130794.1  | 14 | 1.235 |
| DHCR7   | 7-dehydrocholesterol reductase                                            | IPI00130988.1  | 3  | 1.232 |
| ATP2B1  | ATPase, Ca <sup>++</sup> transporting, plasma membrane 1                  | IPI00556827.1  | 3  | 1.228 |
| P4HB    | prolyl 4-hydroxylase, beta polypeptide                                    | IPI00133522.2  | 8  | 1.225 |



|        |                                                                           |               |    |       |
|--------|---------------------------------------------------------------------------|---------------|----|-------|
| RTN1   | reticulon 1                                                               | IPI00459442.1 | 3  | 1.222 |
| RPL9   | ribosomal protein L9                                                      | IPI00881026.1 | 3  | 1.220 |
| CRIP2  | cysteine-rich protein 2                                                   | IPI00121319.1 | 3  | 1.220 |
| EIF4H  | eukaryotic translation initiation factor 4H                               | IPI00222560.7 | 2  | 1.219 |
| RPS9   | ribosomal protein S9                                                      | IPI00420726.3 | 6  | 1.218 |
| COPG1  | coatamer protein complex, subunit gamma 1                                 | IPI00223437.5 | 2  | 1.217 |
| CYB5R3 | cytochrome b5 reductase 3                                                 | IPI00759904.1 | 9  | 1.216 |
| ATP1A2 | ATPase, Na <sup>+</sup> /K <sup>+</sup> transporting, alpha 2 polypeptide | IPI00762871.2 | 14 | 1.215 |
| MIF    | macrophage migration inhibitory factor (glycosylation-inhibiting factor)  | IPI00230427.5 | 2  | 1.213 |
| CTSD   | cathepsin D                                                               | IPI00927957.1 | 5  | 1.211 |
| RPS16  | ribosomal protein S16                                                     | IPI00469918.4 | 4  | 1.210 |
| PLP1   | proteolipid protein 1                                                     | IPI00263013.4 | 8  | 1.208 |
| RPL29  | ribosomal protein L29                                                     | IPI00874437.1 | 2  | 1.208 |
| MARC2  | mitochondrial amidoxime reducing component 2                              | IPI00123276.1 | 3  | 1.207 |
| ITIH2  | inter-alpha-trypsin inhibitor heavy chain 2                               | IPI00970608.1 | 2  | 1.202 |
| RUVBL2 | RuvB-like 2 (E. coli)                                                     | IPI00856697.1 | 2  | 1.202 |

**Table S3: iTRAQ identification of proteins >20% downregulated in *Rab18*<sup>-/-</sup> compared to heterozygotes with 2 or more unique peptides**

| Symbol    | Protein name                                                                        | Accession #   | # Unique peptides | Ratio Rab18/het |
|-----------|-------------------------------------------------------------------------------------|---------------|-------------------|-----------------|
| ALDH1A1   | aldehyde dehydrogenase 1 family, member A1                                          | IPI00626662.3 | 5                 | 0.503           |
| SERPINA1  | serpin peptidase inhibitor, clade A (alpha-1 antiproteinase, antitrypsin), member 1 | IPI00123927.1 | 5                 | 0.539           |
| SDPR      | serum deprivation response                                                          | IPI00135660.5 | 3                 | 0.579           |
| VAT1L     | vesicle amine transport protein 1 homolog (T. californica)-like                     | IPI00222759.3 | 16                | 0.594           |
| MYL6      | myosin, light chain 6, alkali, smooth muscle and non-muscle                         | IPI00354819.5 | 2                 | 0.594           |
| AKR1B1    | aldo-keto reductase family 1, member B1 (aldose reductase)                          | IPI00223757.4 | 13                | 0.604           |
| PMP2      | peripheral myelin protein 2                                                         | IPI00553439.2 | 13                | 0.605           |
| PRX       | periaxin                                                                            | IPI00762284.1 | 64                | 0.616           |
| OGN       | osteoglycin                                                                         | IPI00120848.1 | 13                | 0.625           |
| ASPA      | aspartoacylase                                                                      | IPI00881964.1 | 4                 | 0.626           |
| NEFH      | neurofilament, heavy polypeptide                                                    | IPI00675855.3 | 35                | 0.636           |
| SVIP      | small VCP/p97-interacting protein                                                   | IPI00460224.3 | 2                 | 0.639           |
| CNTF      | ciliary neurotrophic factor                                                         | IPI00125017.1 | 6                 | 0.641           |
| APOA4     | apolipoprotein A-IV                                                                 | IPI00377351.3 | 2                 | 0.654           |
| NEFM      | neurofilament, medium polypeptide                                                   | IPI00323800.6 | 40                | 0.657           |
| TCEB2     | transcription elongation factor B (SIII), polypeptide 2 (18kDa, elongin B)          | IPI00131224.1 | 2                 | 0.664           |
| FBXO2     | F-box protein 2                                                                     | IPI00153176.2 | 2                 | 0.664           |
| Serpina3k | serine (or cysteine) peptidase inhibitor, clade A, member 3K                        | IPI00131830.1 | 4                 | 0.666           |
| SERPINA1  | serpin peptidase inhibitor, clade A (alpha-1 antiproteinase, antitrypsin), member 1 | IPI00406302.2 | 4                 | 0.671           |
| DYNC1L1   | dynein, cytoplasmic 1, light intermediate chain 1                                   | IPI00153421.1 | 2                 | 0.673           |
| NEFL      | neurofilament, light polypeptide                                                    | IPI00554928.3 | 32                | 0.679           |
| TUBA4A    | tubulin, alpha 4a                                                                   | IPI00117350.1 | 6                 | 0.680           |

|          |                                                                     |                |    |       |
|----------|---------------------------------------------------------------------|----------------|----|-------|
| ANXA5    | annexin A5                                                          | IPI00317309.5  | 18 | 0.683 |
| TFG      | TRK-fused gene                                                      | IPI00130013.4  | 7  | 0.683 |
| HDHD2    | haloacid dehalogenase-like hydrolase domain containing 2            | IPI00111166.7  | 2  | 0.684 |
| DDAH1    | dimethylarginine dimethylaminohydrolase 1                           | IPI00109482.3  | 11 | 0.688 |
| PLEKHB1  | pleckstrin homology domain containing, family B (evectins) member 1 | IPI00858298.1  | 2  | 0.690 |
| ANXA6    | annexin A6                                                          | IPI00554894.3  | 38 | 0.693 |
| UBE2K    | ubiquitin-conjugating enzyme E2K                                    | IPI00880781.1  | 2  | 0.693 |
| COL15A1  | collagen, type XV, alpha 1                                          | IPI00648224.1  | 15 | 0.702 |
| DCN      | decorin                                                             | IPI00123196.1  | 15 | 0.707 |
| BCAS1    | breast carcinoma amplified sequence 1                               | IPI00330860.3  | 13 | 0.708 |
| AARS     | alanyl-tRNA synthetase                                              | IPI00321308.4  | 3  | 0.708 |
| CKB      | creatine kinase, brain                                              | IPI00136703.1  | 13 | 0.708 |
| LUM      | lumican                                                             | IPI00313900.1  | 13 | 0.709 |
| LDHB     | lactate dehydrogenase B                                             | IPI00229510.5  | 14 | 0.710 |
| EPB41L2  | erythrocyte membrane protein band 4.1-like 2                        | IPI00330289.4  | 32 | 0.713 |
| TUBA1A   | tubulin, alpha 1a                                                   | IPI00110753.1  | 6  | 0.716 |
| PRKCDBP  | protein kinase C, delta binding protein                             | IPI00126939.1  | 8  | 0.716 |
| PTRF     | polymerase I and transcript release factor                          | IPI00117689.1  | 15 | 0.721 |
| GLO1     | glyoxalase I                                                        | IPI00321734.7  | 6  | 0.724 |
| MDH1     | malate dehydrogenase 1, NAD (soluble)                               | IPI00336324.11 | 13 | 0.727 |
| HSP90AA1 | heat shock protein 90kDa alpha (cytosolic), class A member 1        | IPI00330804.4  | 15 | 0.728 |
| PRKCA    | protein kinase C, alpha                                             | IPI00321446.4  | 2  | 0.731 |
| NAPA     | N-ethylmaleimide-sensitive factor attachment protein, alpha         | IPI00118930.1  | 3  | 0.732 |
| PRDX6    | peroxiredoxin 6                                                     | IPI00754071.1  | 5  | 0.735 |
| PRELP    | proline/arginine-rich end leucine-rich repeat protein               | IPI00122293.3  | 15 | 0.739 |
| NME1     | NME/NM23 nucleoside diphosphate kinase 1                            | IPI00990246.1  | 9  | 0.740 |
| GMFB     | glia maturation factor, beta                                        | IPI00467495.4  | 3  | 0.741 |
| VSNL1    | visinin-like 1                                                      | IPI00230418.5  | 3  | 0.743 |
| DYNLL1   | dynein, light chain, LC8-type 1                                     | IPI00121623.1  | 2  | 0.744 |
| STXBP6   | syntaxin binding protein 6 (amisyn)                                 | IPI00720103.1  | 6  | 0.745 |
| CYB5A    | cytochrome b5 type A (microsomal)                                   | IPI00918942.1  | 3  | 0.746 |
| TUBB     | tubulin, beta class I                                               | IPI00117352.1  | 4  | 0.748 |

|               |                                                                                          |                |    |       |
|---------------|------------------------------------------------------------------------------------------|----------------|----|-------|
| HSPA1A/HSPA1B | heat shock 70kDa protein 1A                                                              | IPI00798482.20 | 5  | 0.748 |
| Ube2n         | ubiquitin-conjugating enzyme E2N                                                         | IPI00165854.3  | 4  | 0.750 |
| TUBB3         | tubulin, beta 3 class III                                                                | IPI00112251.1  | 6  | 0.751 |
| BGN           | biglycan                                                                                 | IPI00123194.1  | 9  | 0.757 |
| GDI1          | GDP dissociation inhibitor 1                                                             | IPI00323179.3  | 10 | 0.759 |
| MAPRE3        | microtubule-associated protein, RP/EB family, member 3                                   | IPI00830432.1  | 3  | 0.763 |
| Atp5h         | ATP synthase, H <sup>+</sup> transporting, mitochondrial F0 complex, subunit d           | IPI00881799.1  | 4  | 0.764 |
| CACYBP        | calcyclin binding protein                                                                | IPI00115650.4  | 2  | 0.770 |
| USP5          | ubiquitin specific peptidase 5 (isopeptidase T)                                          | IPI00881918.1  | 7  | 0.771 |
| CTNND1        | catenin (cadherin-associated protein), delta 1                                           | IPI00752631.1  | 3  | 0.772 |
| RUFY3         | RUN and FYVE domain containing 3                                                         | IPI00622482.2  | 10 | 0.772 |
| YWHAH         | tyrosine 3-monooxygenase/tryptophan 5-monooxygenase activation protein, eta polypeptide  | IPI00227392.5  | 5  | 0.773 |
| SERPINA1      | serpin peptidase inhibitor, clade A (alpha-1 antiproteinase, antitrypsin), member 1      | IPI00129755.2  | 3  | 0.774 |
| Ckmt1         | creatine kinase, mitochondrial 1, ubiquitous                                             | IPI00128296.1  | 7  | 0.777 |
| PGK1          | phosphoglycerate kinase 1                                                                | IPI00555069.3  | 17 | 0.777 |
| DRP2          | dystrophin related protein 2                                                             | IPI00830746.1  | 14 | 0.779 |
| WBP2          | WW domain binding protein 2                                                              | IPI00648905.1  | 3  | 0.780 |
| ANXA3         | annexin A3                                                                               | IPI00132722.9  | 6  | 0.782 |
| HSPA4L        | heat shock 70kDa protein 4-like                                                          | IPI00317711.1  | 8  | 0.786 |
| HSPA8         | heat shock 70kDa protein 8                                                               | IPI00323357.3  | 25 | 0.786 |
| YWHAZ         | tyrosine 3-monooxygenase/tryptophan 5-monooxygenase activation protein, zeta polypeptide | IPI00116498.1  | 11 | 0.786 |
| SNX6          | sorting nexin 6                                                                          | IPI00111827.5  | 2  | 0.789 |
| DAG1          | dystroglycan 1 (dystrophin-associated glycoprotein 1)                                    | IPI00122273.1  | 7  | 0.790 |
| ANXA2         | annexin A2                                                                               | IPI00468203.3  | 25 | 0.790 |
| GSTM3         | glutathione S-transferase mu 3 (brain)                                                   | IPI00990550.1  | 3  | 0.791 |
| IDH1          | isocitrate dehydrogenase 1 (NADP <sup>+</sup> ), soluble                                 | IPI00762452.2  | 11 | 0.791 |
| RAP2A         | RAP2A, member of RAS oncogene family                                                     | IPI00396701.3  | 2  | 0.795 |
| IDH3A         | isocitrate dehydrogenase 3 (NAD <sup>+</sup> ) alpha                                     | IPI00608078.1  | 3  | 0.796 |
| MARCKS        | myristoylated alanine-rich protein kinase C substrate                                    | IPI00229534.5  | 4  | 0.798 |
| RAP1GDS1      | RAP1, GTP-GDP dissociation stimulator 1                                                  | IPI00653794.2  | 21 | 0.798 |

|        |                                                                                   |               |    |       |
|--------|-----------------------------------------------------------------------------------|---------------|----|-------|
| PPP1R7 | protein phosphatase 1, regulatory subunit 7                                       | IPI00129319.3 | 2  | 0.799 |
| CAPNS1 | calpain, small subunit 1                                                          | IPI00830335.1 | 3  | 0.799 |
| FSCN1  | fascin homolog 1, actin-bundling protein ( <i>Strongylocentrotus purpuratus</i> ) | IPI00353563.4 | 16 | 0.799 |
| PYGB   | phosphorylase, glycogen; brain                                                    | IPI00229796.3 | 20 | 0.799 |
| ALDH2  | aldehyde dehydrogenase 2 family (mitochondrial)                                   | IPI00111218.1 | 13 | 0.799 |
